# Supplementary material
Source: PubMed Central journal article supplement (PMC5494828)
Supplement: NIHMS867591-supplement-supplement_1.pdf [file NIHMS867591-supplement-supplement_1.pdf]

Supplementary Table 1. Adjusted ORs for pancreatic cancer for a unit increment of the WCRF/AICR score, by strata of selected covariates. Italy 1991-2008.

|                                      | Cases/controls | Adjusted OR (95% CI) <sup>a</sup> |
|--------------------------------------|----------------|-----------------------------------|
| Sex                                  |                |                                   |
| Males                                | 174/348        | 0.67 (0.52-0.86)                  |
| Females                              | 152/304        | 0.80 (0.61-1.07)                  |
| Age (years)                          |                |                                   |
| <60                                  | 121/242        | 0.90 (0.68-1.19) <sup>c</sup>     |
| ≥60                                  | 205/410        | 0.62 (0.49-0.79) <sup>c</sup>     |
| Education (years) <sup>b</sup>       |                |                                   |
| <7                                   | 166/350        | 0.78 (0.61-1.00)                  |
| ≥7                                   | 158/300        | 0.66 (0.51-0.87)                  |
| Body mass index (kg/m <sup>2</sup> ) |                |                                   |
| <25                                  | 139/264        | 0.73 (0.60-0.88)                  |
| ≥25                                  | 185/385        | 0.67 (0.55-0.83)                  |
| Tobacco smoking <sup>b</sup>         |                |                                   |
| Never smoker                         | 137/328        | 0.80 (0.61-1.05)                  |
| Ex smoker                            | 86/189         | 0.56 (0.39-0.80)                  |
| Current smoker                       | 102/133        | 0.79 (0.56-1.12)                  |
| Diabetes                             |                |                                   |
| No                                   | 279/615        | 0.76 (0.62-0.92)                  |
| Yes                                  | 47/37          | 0.51 (0.29-0.88)                  |

AICR: American Institute of Cancer Research; OR: odds ratio; CI: confidence interval; WCRF: World Cancer Research Fund.

<sup>a</sup> Covariates include: sex, study center, year of interview, age, education, body mass index, tobacco smoking, and history of diabetes.

<sup>b</sup> The sum is not the total number of subjects due to missing values.

<sup>c</sup> p-value for heterogeneity between strata <0.05.
